# Supplementary material for: Burden of Illness of Type 2 Diabetes Mellitus in the Kingdom of Saudi Arabia: A Five-Year Longitudinal Study
Source: PubMed Central journal article supplement — Adv Ther. 2024 Jan 19;41(3):1120–50. doi: 10.1007/s12325-023-02772-y (PMC10879361; doi:10.1007/s12325-023-02772-y), 2024-01-19
Supplement: 12325_2023_2772_MOESM1_ESM.pdf [file 12325_2023_2772_MOESM1_ESM.pdf]

## SUPPLEMENTARY MATERIAL

### **Burden of Illness of Type 2 Diabetes Mellitus in the Kingdom of Saudi Arabia: A Five-Year Longitudinal Study**

**Authors:** Mohammed AlHarbi<sup>1</sup>, Abdullah Othman<sup>2</sup>, Ahmed Ali Nahari<sup>3</sup>, Ahmed Hamdan Al-Jedai<sup>1</sup>, Daniel Cuadras<sup>4</sup>, Faisal Almalky<sup>5</sup>, Fayez AlAzmi<sup>6</sup>, Hajer Yousef Almudaiheem<sup>1</sup>, Hamad AlShubrumi<sup>7</sup>, Hameed AlSwat<sup>8</sup>, Homaid AlSahafi<sup>9</sup>, Kamelia Sindi<sup>10</sup>, Khadija Basaikh<sup>11</sup>, Majed AlQahtani<sup>12</sup>, Mark Lamotte<sup>13</sup>, Moataz Yahia<sup>14</sup>, Mohamed El-Khedr Hassan<sup>14</sup>, Mohammed AlMutlaq<sup>15</sup>, Mohammed AlRoaly<sup>16</sup>, Somaya AlZelaye<sup>17</sup>, and Zein AlGhamdi<sup>18</sup>

#### **Affiliations:**

<sup>1</sup>Therapeutic Services, Ministry of Health, KSA

<sup>2</sup>Assir central Hospital, Assir Diabetes Centre, Saudi Arabia

<sup>3</sup>King Fahad Central Hospital, Jazan, Saudi Arabia

<sup>4</sup>IQVIA, 08025 Barcelona, Spain

<sup>5</sup>Diabetology center, Al Noor specialist hospital, Makkah, Saudi Arabia

<sup>6</sup>Endocrine and Diabetic Specialized Center, Al-Qurayyat General Hospital, Saudi Arabia

<sup>7</sup>Buraidah Diabetes Centre, King Fahad Specialist Hospital, Saudi Arabia

<sup>8</sup>King Abdulaziz Specialized Hospital, Taif, Saudi Arabia

<sup>9</sup>Diabetes and Endocrinology Center, Hera General Hospital, Makkah, Saudi Arabia

<sup>10</sup>Dammam Medical Complex, Saudi Arabia

<sup>11</sup>Endocrine and Diabetes center, King Abdulaziz Hospital, Jeddah, Saudi Arabia

<sup>12</sup>Diabetes Center, King Fahad Specialized Hospital, Tabuk, Saudi Arabia

<sup>13</sup>Global HEOR, IQVIA, Belgium

<sup>14</sup>Novo Nordisk, Saudi Arabia

<sup>15</sup>Diabetes Center, King Saud Hospital, Unaizah, Saudi Arabia

<sup>16</sup>Endocrine and Diabetic Center, King Abdulaziz Specialist Hospital, Saudi Arabia

<sup>17</sup>Center of Endocrinology and Diabetes Mellitus, Al-Qunfudah General Hospital, Al-Qunfudah, Makkah Province, Saudi Arabia

<sup>18</sup>Diabetes Centre at King Fahad Hospital, Madina, Saudi Arabia

**Corresponding author:** Mohammed AlHarbi

Therapeutic Services, Ministry of Health, KSA

Email: myh.alharbi24@gmail.com

Telephone: 00966555832994

## Supplementary tables

**Supplementary Table 1: Economic input parameters used in the CDM**

| Variable                                           | Description                                                                                       | Value (SAR) | References/Notes                                                                                                                                         |
|----------------------------------------------------|---------------------------------------------------------------------------------------------------|-------------|----------------------------------------------------------------------------------------------------------------------------------------------------------|
| <b>Management costs</b>                            |                                                                                                   |             |                                                                                                                                                          |
| Annual statins treatment                           | Annual cost for statin treatment (applied if patient is on 1° or 2° prevention)                   | 41.23       | Cost from NUPCO.<br>Weighted average cost of different Statins prescribed in Saudi as per published source                                               |
| Annual aspirin treatment                           | Annual cost for aspirin treatment (applied if patient is on 1° or 2° prevention)                  | 30.88       | Cost from SFDA.<br>Adult dose of Aspirin 300 mg (SAR3.5, 30 Pack), CIF price calculated by applying pharmacist (20%) and local distributor markups (15%) |
| Annual ACE inhibitor treatment                     | Annual cost for ACE inhibitor treatment (applied if patient is on 1° or 2° prevention)            | 59.76       | Cost from NUPCO.<br>weighted average cost of different ACE-I/ARB prescribed in Saudi                                                                     |
| Annual screening for MA                            | Annual cost for MA screening (applied if patient is screened)                                     | 160.00      | MoH service cost list,<br>Cost of "combination of urine albumin and protein ratio (microalbumin)" SAR 160- single test is considered annually            |
| Annual screening for GRP                           | Annual cost for MA (applied if patient is screened)                                               | 40.00       | MoH service cost list,<br>Cost of "urine protein" SAR 40, single test is considered annually                                                             |
| ACE inhibitor treatment discontinuation due to AEs | One off-event cost for stopping treatment with ACE inhibitors or ARB due to AEs                   | 75.00       | MoH service cost list,<br>Assumption of one-time general physician visit cost is considered                                                              |
| Screening for retinopathy                          | Cost for an ophthalmologist visit for eye screening in diabetes-related diseases (assumed annual) | 254.00      | MoH service cost list,<br>Cost of "Examination- eye" (SAR 104) and "ophthalmology cons fee consultation" (SAR 150)- single unit is considered annually   |

| <b>Direct cost of complications</b> |                                                                                |            |                                                                                                        |
|-------------------------------------|--------------------------------------------------------------------------------|------------|--------------------------------------------------------------------------------------------------------|
| MI (1 <sup>st</sup> year)           | Annual costs applied in the year MI occurs                                     | 65,273.30  | [1]                                                                                                    |
| MI (2 <sup>nd</sup> year)           | Annual costs applied in the years after MI occurs                              | 4,603.89   | Assumed same as 1 <sup>st</sup> year                                                                   |
| Angina (1 <sup>st</sup> year)       | Annual costs applied in the year unstable angina occurs                        | 46,682.45  | [2]<br>Assuming cost of unstable angina for 1 <sup>st</sup> year                                       |
| Angina (2 <sup>nd</sup> + year)     | Annual costs applied in the years after angina occurs                          | 4,603.89   | [3]                                                                                                    |
| CHF (1 <sup>st</sup> year)          | Annual costs applied in the year CHF occurs                                    | 133,759.51 | [1]                                                                                                    |
| CHF (2 <sup>nd</sup> year)          | Annual costs applied in the years after CHF occurs                             | 4,603.89   | Assumed same as 2 <sup>nd</sup> year cost of angina                                                    |
| Stroke (1 <sup>st</sup> year)       | Annual costs applied in the year stroke occurs                                 | 172,564.33 | [1]                                                                                                    |
| Stroke (2 <sup>nd</sup> year)       | Annual costs applied in the years after stroke occurs                          | 57,102.43  | [1]<br>Assumed the annual cost of acute stroke rehabilitation 2 <sup>nd</sup> year onwards             |
| Stroke death within 30 days         | Annual costs applied in the year stroke occurs and subject dies within 30 days | 21,000.00  | Considered cost of hospitalization for next 30 days as proxy indicator for stroke death within 30 days |
| PVD (1 <sup>st</sup> year)          | Annual costs applied in the year PVD occurs                                    | 21,819.38  | [3]                                                                                                    |
| PVD (2 <sup>nd</sup> year)          | Annual costs applied in the years after PVD occurs                             | 4,603.89   | Assumed same as 2 <sup>nd</sup> year cost of angina                                                    |
| Hemodialysis (1 <sup>st</sup> year) | Annual costs applied in the                                                    | 343,892.83 | [4]                                                                                                    |

|                                            |                                                                                          |            |                                                                                                                                                                           |
|--------------------------------------------|------------------------------------------------------------------------------------------|------------|---------------------------------------------------------------------------------------------------------------------------------------------------------------------------|
|                                            | year ESRD occurs and is treated by hemodialysis                                          |            |                                                                                                                                                                           |
| Hemodialysis (2 <sup>nd</sup> year)        | Annual costs applied in the year after ESRD occurs and is treated by hemodialysis        | 343,896.01 | Calculated by subtracting the 1 <sup>st</sup> year cost from 4 year cost available in the literature and then divided by 3 assuming same cost is incurred in next 3 years |
| Peritoneal Dialysis (1 <sup>st</sup> year) | Annual costs applied in the year ESRD occurs and is treated by peritoneal dialysis       | 343,892.83 | Assumed same as annual cost for HD                                                                                                                                        |
| Peritoneal Dialysis (2 <sup>nd</sup> year) | Annual costs applied in the year after ESRD occurs and is treated by peritoneal dialysis | 343,896.01 | Assumed same as annual cost for HD                                                                                                                                        |
| Renal transplant (1 <sup>st</sup> year)    | Annual costs applied in the year ESRD occurs and is treated by renal transplant          | 414,392.25 | [4]                                                                                                                                                                       |
| Renal transplant (2 <sup>nd</sup> year)    | Annual costs applied in the year after ESRD occurs and is treated by renal transplant    | 61,726.02  | [4]                                                                                                                                                                       |
| Non-severe hypoglycaemia                   | Cost for a non-severe hypoglycaemic event (not requiring external assistance)            | 750.0      | Cost per service captured from MoH service cost list and NUPCO.<br>Cost calculated based on discussion with MoH (including SMBG, test strips and lancets)                 |
| Severe hypoglycaemia Type 1                | Cost for a type 1 severe hypoglycaemic                                                   | 121.68     | Cost per service captured from MoH service cost list and NUPCO.                                                                                                           |

|                                                    |                                                                                                                              |          |                                                                                                                                                               |
|----------------------------------------------------|------------------------------------------------------------------------------------------------------------------------------|----------|---------------------------------------------------------------------------------------------------------------------------------------------------------------|
|                                                    | event (not requiring medical assistance. e.g. from friends or family members)                                                |          | Cost assumed similar to NSHE (plus additional cost for glucagon hydrochloride)                                                                                |
| Severe hypoglycaemia type 2                        | Costs for a type 2 severe hypoglycaemic event (requiring medical assistance e.g. health care practitioners, hospitalization) | 1,711.90 | Cost per service captured from MoH service cost list and drug cost from NUPCO. Based on discussion with MoH                                                   |
| Diabetic ketoacidosis                              |                                                                                                                              | 3,929.40 | [5]<br>Service costs obtained from MoH service cost list                                                                                                      |
| Laser treatment                                    | Cost for laser treatment/retinal photocoagulation                                                                            | 4,139.93 | [3]                                                                                                                                                           |
| Cataract surgical treatment (1 <sup>st</sup> year) | Cost for first or second cataract surgery in the first year                                                                  | 7,445.63 | [3]                                                                                                                                                           |
| Cataract surgical treatment (2 <sup>nd</sup> year) | Cost for subsequent years after cataract surgery                                                                             | 430.00   | Using proxy services available in MoH price list: Removal post cataract suture/or corneal suture removal" (SAR 280) + "Ophthalmologist consultation" (SAR150) |
| Blindness (1 <sup>st</sup> year)                   | Annual cost applied in the year blindness occurs                                                                             | 5,792.78 | Average of laser treatment cost and cost of cataract operation                                                                                                |
| Blindness (2 <sup>nd</sup> year)                   | Annual cost applied in the year after blindness occurs                                                                       | 5,792.78 | Considered same as cost of blindness treatment in year of onset                                                                                               |
| Neuropathy (1 <sup>st</sup> year)                  | Annual cost applied in the year neuropathy occurs                                                                            | 1,631.05 | Cost per service captured from MoH service cost list and SFDA.                                                                                                |
| Neuropathy (2 <sup>nd</sup> year)                  | Annual cost applied in the year after neuropathy occurs                                                                      | 1,631.05 | Assumed same as 1 <sup>st</sup> year                                                                                                                          |

|                 |                                                                                   |           |                                                                               |
|-----------------|-----------------------------------------------------------------------------------|-----------|-------------------------------------------------------------------------------|
| Active ulcer    |                                                                                   | 6,684.90  | [6]<br>Per patient cost of diabetic foot ulcer (SAR 6684.9) specific to Saudi |
| Amputation      | Cost of amputation event (all medical costs except prosthesis)                    | 14,690.50 | [3]                                                                           |
| Post amputation | Annual cost applied in the year after ulcer is healed and treated with amputation | 8,801.81  | [3]                                                                           |

*ACE-I* angiotensin converting enzyme inhibitor, *AE* adverse events, *ARB* angiotensin receptor blocker, *CDM* Core Diabetes Model, *CIF* cost, insurance, and freight, *CHF* congestive heart failure, *ESRD* end-stage renal disease, *GRP* gross renal proteinuria, *HD* hemodialysis, *MA* microalbuminuria, *MI* myocardial infarction, *MoH* Ministry of Health, *NUPCO* National Unified Procurement Company, *PVD* peripheral vascular disease, *SAR* Saudi Arabian Riyal, *SFDA* Saudi Food and Drug Authority, *SMBG* self-monitoring blood glucose.

**Supplementary Table 2: Sensitivity and specificity of screening tests associated with T2DM-related complications**

| <b>Parameter</b>          | <b>Value</b> | <b>Source</b> |
|---------------------------|--------------|---------------|
| Sensitivity eye screening | 0.987        | [7]           |
| Specificity eye screening | 0.800        | [7]           |
| Sensitivity GRP screening | 1.000        | [8]           |
| Sensitivity MA screening  | 1.000        | [8]           |
| Specificity MA screening  | 0.913        | [8]           |

*GRP* gross renal proteinuria, *MA* microalbuminuria.



**Supplementary Table 3: Utility inputs used for the CDM**

| <b>Quality of life utilities</b> | <b>Mean</b> | <b>SE/SD</b> | <b>Sources/Comments</b> |
|----------------------------------|-------------|--------------|-------------------------|
| U T2 no complications            | 0.7850      | 0.0531       | [9]                     |
| DisU MI event                    | -0.05500    | 0.00660      | [9]                     |
| U post MI                        | 0.7300      | 0.0066       | [9]                     |
| U angina                         | 0.6950      | 0.0184       | [9]                     |
| U CHF                            | 0.6770      | 0.0306       | [9]                     |
| DisU stroke event                | -0.16400    | 0.03010      | [9]                     |
| U post Stroke                    | 0.6210      | 0.0301       | [9]                     |
| U PVD                            | 0.7240      | 0.0286       | [9]                     |
| U MA                             | 0.7850      | 0.0531       | [9]                     |
| U GRP                            | 0.7370      | 0.0219       | [9]                     |
| U HD                             | 0.6210      | 0.0561       | [9]                     |
| U PD                             | 0.5810      | 0.1378       | [9]                     |
| U RT                             | 0.7620      | 0.0531       | [9]                     |
| U BDR                            | 0.7450      | 0.0617       | [9]                     |
| U BDR wrongly treated            | 0.7450      | 0.0617       | [9]                     |
| U PDR laser treated              | 0.7150      | 0.0148       | [9]                     |
| U PDR no Laser                   | 0.7150      | 0.0148       | [9]                     |
| U ME                             | 0.7450      | 0.0133       | [9]                     |
| U SVL                            | 0.7110      | 0.0250       | [9]                     |
| U cataract                       | 0.7690      | 0.0077       | [9]                     |
| U neuropathy                     | 0.7010      | 0.0138       | [9]                     |
| DisU active ulcer                | -0.17000    | 0.01890      | [9]                     |
| DisU amputation event            | -0.28000    | 0.05610      | [9]                     |
| U post amputation                | 0.5050      | 0.0561       | -                       |
| Diminishing NSHE disutility      | Yes         |              | [10]                    |
| DisU NSHE (during daytime)       | -0.00335    | 0.00100      | [11]                    |
| DisU NSHE (nocturnal)            | -0.00335    | 0.00100      | [11]                    |
| Dis U SHE 1 (during daytime)     | -0.01370    | 0.00100      | [11]                    |
| Dis U SHE 1 (nocturnal)          | -0.01370    | 0.00100      | [11]                    |
| Dis U SHE 2 (during daytime)     | -0.05780    | 0.00100      | [11]                    |

|                                                                  |                                |         |      |
|------------------------------------------------------------------|--------------------------------|---------|------|
| Dis U SHE 2<br>(nocturnal)                                       | -0.05780                       | 0.00100 | [11] |
| U adverse event 1                                                | 0.78500                        | -       | [9]  |
| BMI utility approach                                             | Apply static BMI<br>disutility |         | -    |
| DisU for 1 unit increase<br>in BMI above 25<br>Kg/m <sup>2</sup> | -0.00610                       | -       | [12] |

*BDR* background retinopathy, *BMI* body mass index, *CHF* congestive heart failure, *DisU* disutility of an event, *GRP* gross renal proteinuria, *HD* haemodialysis, *MA* microalbuminuria, *ME* macular oedema, *MI* myocardial infarction, *NSHE* non-severe hypoglycaemia, *Oz* ounce, *PD* peritoneal dialysis, *PDR* proliferative diabetic retinopathy, *PVD* peripheral vascular, *RT* renal transplant, *SE* standard error, *SD* standard deviation, *SHE1* severe hypoglycaemia event (requiring non-medical assistance), *SHE2* severe hypoglycaemia event (requiring medical assistance), *SVL* severe vision loss, *T2* Type 2 diabetes mellitus, *U* health state utility

**Supplementary Table 4 Baseline demographics, risk factors and existing complications of the main population**

| <b>Parameters</b>                                       | <b>Description</b>     | <b>Overall<br/>(N=2226)</b> |
|---------------------------------------------------------|------------------------|-----------------------------|
| Gender                                                  | Male                   | 1085 (48.8%)                |
|                                                         | Female                 | 1139 (51.2%)                |
|                                                         | Missing (n)            | 2                           |
| Start age of T2DM                                       | N                      | 2109                        |
|                                                         | Mean (SD), (years)     | 47.8 (11.1)                 |
|                                                         | Missing (n)            | 117                         |
| Time of follow-up <sup>a</sup>                          | N                      | 2157                        |
|                                                         | Mean (SD), (years)     | 8.3 (1.5)                   |
|                                                         | Missing (n)            | 69                          |
| Ethnic group                                            | Arab/Saudi             | 1347 (71.2%)                |
|                                                         | White                  | 272 (14.4%)                 |
|                                                         | Black                  | 33 (1.7%)                   |
|                                                         | Hispanic               | 0 (0.0%)                    |
|                                                         | Native American        | 1 (0.1%)                    |
|                                                         | Asian/Pacific Islander | 232 (12.3%)                 |
|                                                         | Other                  | 7 (0.4%)                    |
|                                                         | Missing (n)            | 334                         |
| Family history of T2DM                                  | Yes                    | 651 (73.5%)                 |
|                                                         | No                     | 235 (26.5%)                 |
|                                                         | Missing (n)            | 1340                        |
| Alcohol consumption status at initial diagnosis of T2DM | Never                  | 1372 (100.0%)               |
|                                                         | Current                | 0 (0.0%)                    |
|                                                         | Former                 | 0 (0.0%)                    |
|                                                         | Missing (n)            | 854                         |
| Weekly alcohol consumption <sup>b</sup>                 | N                      | 0                           |
|                                                         | Mean (SD), (oz/week)   | NA                          |
|                                                         | Missing (n)            | 0                           |
| Smoking status at initial diagnosis of T2DM             | Never                  | 1085 (90.7%)                |
|                                                         | Current                | 87 (7.3%)                   |
|                                                         | Former                 | 24 (2.0%)                   |
|                                                         | Missing (n)            | 1030                        |
| Number of cigarettes smoked per day <sup>b</sup>        | N                      | 43                          |
|                                                         | Mean (SD)              | 13.9 (6.9)                  |
|                                                         | Missing (n)            | 68                          |
| Pack years <sup>b</sup>                                 | N                      | 42                          |
|                                                         | Mean (SD)              | 8.6 (5.9)                   |

|                                                   |                                               |              |
|---------------------------------------------------|-----------------------------------------------|--------------|
|                                                   | Missing (n)                                   | 69           |
| BMI                                               | N                                             | 1244         |
|                                                   | Mean (SD),<br>(numerical, kg/m <sup>2</sup> ) | 31.0 (5.8)   |
|                                                   | Missing (n)                                   | 982          |
| BMI (categorical)                                 | Underweight                                   | 5 (0.4%)     |
|                                                   | Normal weight                                 | 156 (12.5%)  |
|                                                   | Overweight                                    | 430 (34.6%)  |
|                                                   | Obesity                                       | 653 (52.5%)  |
|                                                   | Missing (n)                                   | 982          |
| Waist-to-hip ratio                                | N                                             | 112          |
|                                                   | Mean (SD)                                     | 0.88 (0.056) |
|                                                   | Missing (n)                                   | 2114         |
| Heart rate                                        | N                                             | 886          |
|                                                   | Mean (SD), (bpm)                              | 84.7 (9.7)   |
|                                                   | Missing (n)                                   | 1340         |
| SBP                                               | N                                             | 1060         |
|                                                   | Mean (SD), (mmHg)                             | 134.8 (16.9) |
|                                                   | Missing (n)                                   | 1166         |
| DBP                                               | N                                             | 1060         |
|                                                   | Mean (SD), (mmHg)                             | 79.2 (9.1)   |
|                                                   | Missing (n)                                   | 1166         |
| <b>Baseline laboratory data and complications</b> |                                               |              |
| Haemoglobin <sup>c</sup>                          | N                                             | 390          |
|                                                   | Mean (SD), (g/dL)                             | 13.9 (1.9)   |
|                                                   | Missing (n)                                   | 1836         |
| WBC <sup>d</sup>                                  | N                                             | 388          |
|                                                   | Mean (SD),<br>(10 <sup>6</sup> /mL)           | 7.2 (2.3)    |
|                                                   | Missing (n)                                   | 1838         |
| HbA1c <sup>e</sup>                                | N                                             | 1055         |
|                                                   | Mean (SD), (%)                                | 9.0 (2.1)    |
|                                                   | Missing (n)                                   | 1173         |
| Serum creatinine <sup>f</sup>                     | N                                             | 461          |
|                                                   | Mean (SD), (mg/dL)                            | 0.81 (0.23)  |
|                                                   | Missing (n)                                   | 1767         |
| Serum albumin <sup>g</sup>                        | N                                             | 264          |
|                                                   | Mean (SD), (g/dL)                             | 3.8 (0.52)   |
|                                                   | Missing (n)                                   | 1962         |
| T-Chol <sup>h</sup>                               | N                                             | 565          |
|                                                   | Mean (SD), (mg/dL)                            | 191.2 (46.7) |
|                                                   | Missing (n)                                   | 1663         |
| HDL <sup>h</sup>                                  | N                                             | 400          |
|                                                   | Mean (SD), (mg/dL)                            | 43.9 (16.5)  |

|                                                    |                                             |               |
|----------------------------------------------------|---------------------------------------------|---------------|
|                                                    | Missing (n)                                 | 1828          |
| LDL <sup>h</sup>                                   | N                                           | 461           |
|                                                    | Mean (SD), (mg/dL)                          | 124.4 (40.1)  |
|                                                    | Missing (n)                                 | 1767          |
| TRIG <sup>i</sup>                                  | N                                           | 737           |
|                                                    | Mean (SD), (mg/dL)                          | 183.6 (171.3) |
|                                                    | Missing (n)                                 | 1491          |
| eGFR                                               | N                                           | 10            |
|                                                    | Mean (SD),<br>(mL/min/1.73 m <sup>2</sup> ) | 105.3 (35.2)  |
|                                                    | Missing (n)                                 | 2216          |
| UACR <sup>j</sup>                                  | N                                           | 12            |
|                                                    | Mean (SD),<br>(mg/mmol)                     | 48.6 (60.4)   |
|                                                    | Missing (n)                                 | 2214          |
| <b>Baseline existing complications of patients</b> |                                             |               |
| Cardiovascular                                     | Yes                                         | 106 (5.5%)    |
|                                                    | No                                          | 1828 (94.5%)  |
|                                                    | Missing (n)                                 | 292           |
| Cardiovascular subcategory <sup>k</sup>            | MI                                          | 22 (1.1%)     |
|                                                    | Angina                                      | 10 (0.5%)     |
|                                                    | PVD                                         | 2 (0.1%)      |
|                                                    | Stroke                                      | 4 (0.2%)      |
|                                                    | CHF                                         | 14 (0.7%)     |
|                                                    | Atrial fibrillation                         | 4 (0.2%)      |
|                                                    | LVH                                         | 1 (0.1%)      |
|                                                    | Unknown                                     | 49 (2.5%)     |
| Renal                                              | Yes                                         | 16 (0.8%)     |
|                                                    | No                                          | 1912 (99.2%)  |
|                                                    | Missing (n)                                 | 298           |
| Renal subcategory <sup>k</sup>                     | MA                                          | 1 (0.1%)      |
|                                                    | GRP                                         | 0 (0.0%)      |
|                                                    | ESRD                                        | 1 (0.1%)      |
|                                                    | Unknown                                     | 14 (0.7%)     |
| Ocular                                             | Yes                                         | 80 (4.2%)     |
|                                                    | No                                          | 1846 (95.8%)  |
|                                                    | Missing (n)                                 | 300           |
| Ocular subcategory <sup>k</sup>                    | BDR                                         | 4 (0.2%)      |
|                                                    | PDR                                         | 11 (0.6%)     |
|                                                    | SVL                                         | 16 (0.8%)     |
|                                                    | ME                                          | 0 (0.0%)      |
|                                                    | Cataract                                    | 35 (1.8%)     |
|                                                    | Unknown                                     | 15 (0.8%)     |
| Foot ulcer                                         | Yes                                         | 14 (0.7%)     |
|                                                    | No                                          | 1910 (99.3%)  |

|                                                  |                                  |              |
|--------------------------------------------------|----------------------------------|--------------|
|                                                  | Missing (n)                      | 302          |
| Foot ulcer subcategory <sup>k</sup>              | Uninfected foot ulcer            | 4 (0.2%)     |
|                                                  | Infected foot ulcer              | 1 (0.1%)     |
|                                                  | Healed foot ulcer                | 2 (0.1%)     |
|                                                  | History of lower limb amputation | 0 (0.0%)     |
|                                                  | Unknown                          | 7 (0.4%)     |
| Foot ulcer subcategory (aggregated) <sup>k</sup> | Foot ulcer (any type)            | 7 (0.4%)     |
| Neuropathy                                       | Yes                              | 29 (1.5%)    |
|                                                  | No                               | 1886 (98.5%) |
|                                                  | Missing (n)                      | 311          |

*bpm* beats per minute, *BMI* body mass index, *CHF* congestive heart failure, *DBP* diastolic blood pressure, *eGFR* estimated glomerular filtration rate, *ESRD* end-stage renal disease, *GRP* gross renal proteinuria, *HbA1c* haemoglobin A1c, *HDL* high-density lipoprotein, *LDL* low-density lipoprotein, *LVH* left ventricular failure *MA* microalbuminuria, *ME* macular oedema, *MI* myocardial infarction, *N* Total number of patients with available data, *NA* not applicable, *oz* ounce, *PDR* proliferative diabetic retinopathy, *PVD* peripheral vascular disease, *Q* quartile, *SBP* systolic blood pressure, *SD* standard deviation, *SVL* severe visual loss, *T2DM* type 2 diabetes mellitus, *TRIG* triglycerides, *UACR* urinary albumin creatinine ratio, *WBC* white blood cell count.

<sup>a</sup> Time between diagnosis of T2DM and SIV.

<sup>b</sup> For current and former consumers.

<sup>c</sup> Only values in g/dL are used (values in mmol/L inconsistent). Values >100 g/dL are discarded.

<sup>d</sup> Values greater than  $30 \times 10^6$ /mL are discarded.

<sup>e</sup> Values in mmol/L converted as % =  $(18.015 \times \text{mmol/L} + 46.7) / 28.7$ . Two patients with values 60 and 807 mmol/L are discarded.

<sup>f</sup> Only values in mg/dL are used (values in micromole/L inconsistent). Values greater than 3.4 mg/dL are discarded.

<sup>g</sup> Only values in g/dL are used (values in micromole/L and g/L inconsistent). Values greater than 30 g/dL are discarded.

<sup>h</sup> Values in micromole/L converted as 1 micromol/L = 38.67 g/dL. Values lower than 10 or greater than 2000 g/dL are discarded.

<sup>i</sup> Values in micromole/L converted as 1 micromol/L = 88.57 g/dL. Values lower than 10 or greater than 6000 g/dL are discarded.

<sup>j</sup> Two values reported in mmol/L, eight in mg/dL, two in missing units. Since no conversion can be made, they are reported as if they all were in mg/mmol.

<sup>k</sup> Multi-response question. Denominators for % calculation exclude patients with missing value in the main category.

**Supplementary Table 5: Description of T2DM treatments including monotherapy or combinations (by LoT)**

| Type of drugs and ATC codes                                                               | Drug class                                                               | Values                                                       |
|-------------------------------------------------------------------------------------------|--------------------------------------------------------------------------|--------------------------------------------------------------|
| <i>Monotherapy or combinations used during 2<sup>nd</sup> LoT</i>                         |                                                                          |                                                              |
| ATC codes <sup>a</sup>                                                                    | Drug class                                                               | 2 <sup>nd</sup> LoT (N=352) <sup>b</sup>                     |
| A10BH                                                                                     | DPP-4 inhibitors                                                         | 120 (34.1%)                                                  |
| A10BB                                                                                     | Sulphonylureas                                                           | 57 (16.2%)                                                   |
| A10AE                                                                                     | Long-acting insulins                                                     | 36 (10.2%)                                                   |
| A10BB + A10BH                                                                             | Sulphonylureas + DPP-4 inhibitors                                        | 16 (4.5%)                                                    |
| A10BA                                                                                     | Biguanides                                                               | 15 (4.3%)                                                    |
| A10AB + A10AE                                                                             | Fast-acting insulins + long-acting insulins                              | 14 (4.0%)                                                    |
| A10AD                                                                                     | Intermediate or long-acting insulins combined with fast-acting           | 14 (4.0%)                                                    |
| A10AB                                                                                     | Fast-acting insulins                                                     | 12 (3.4%)                                                    |
| A10AC                                                                                     | Intermediate-acting insulins                                             | 11 (3.1%)                                                    |
| A10BJ                                                                                     | GLP-1 analogues                                                          | 8 (2.3%)                                                     |
| A10AE + A10BB                                                                             | Long-acting insulins + sulphonylureas                                    | 5 (1.4%)                                                     |
| A10AE + A10BH                                                                             | Long-acting insulins + DPP-4 inhibitors                                  | 5 (1.4%)                                                     |
| A10BA + A10BH                                                                             | Biguanides + DPP-4 inhibitors                                            | 4 (1.1%)                                                     |
| A10BK                                                                                     | SGLT2 inhibitors                                                         | 4 (1.1%)                                                     |
| Other regimens                                                                            |                                                                          | 31 (8.8%)                                                    |
| <i>Monotherapy or combinations used during both 1<sup>st</sup> and 2<sup>nd</sup> LoT</i> |                                                                          |                                                              |
| ATC codes <sup>c</sup>                                                                    | Drug class                                                               | 1 <sup>st</sup> and 2 <sup>nd</sup> LoT (N=352) <sup>b</sup> |
| A10BA + A10BB, A10BH                                                                      | Biguanides + sulphonylureas, DPP-4 inhibitors                            | 85 (24.1%)                                                   |
| A10BA, A10BB                                                                              | Biguanides, sulphonylureas                                               | 27 (7.7%)                                                    |
| A10BA, A10BH                                                                              | Biguanides, DPP-4 inhibitors                                             | 18 (5.1%)                                                    |
| A10BA + A10BB + A10BH, A10AE                                                              | Biguanides + sulphonylureas + DPP-4 inhibitors, long-acting insulins     | 16 (4.5%)                                                    |
| A10BA + A10BB, A10BB                                                                      | Biguanides + sulphonylureas, sulphonylureas                              | 16 (4.5%)                                                    |
| A10BA + A10BB, A10AE                                                                      | Biguanides + sulphonylureas, long-acting insulins                        | 15 (4.3%)                                                    |
| A10BA, A10BB + A10BH                                                                      | Biguanides, sulphonylureas + DPP-4 inhibitors                            | 8 (2.3%)                                                     |
| A10BA + A10BB, A10AD                                                                      | Biguanides + sulphonylureas, premixed insulins                           | 7 (2.0%)                                                     |
| A10BA + A10BB + A10BH, A10BH                                                              | Biguanides + sulphonylureas + DPP-4 inhibitors, DPP-4 inhibitors         | 6 (1.7%)                                                     |
| A10BA + A10BB, A10AB + A10AE                                                              | Biguanides + sulphonylureas, fast-acting insulins + long-acting insulins | 6 (1.7%)                                                     |

|                |             |
|----------------|-------------|
| Other regimens | 148 (42.0%) |
|----------------|-------------|

*ATC* anatomical therapeutic chemical, *DPP-4* dipeptidyl peptidase 4, *GLP-1* glucagon-like peptide-1, *LoT* line of therapy, *SGLT2* sodium-glucose co-transporter 2, *T2DM* type 2 diabetes mellitus.

<sup>a</sup> Only regimens present in at least 1% of patients with a 2<sup>nd</sup> LoT will be reported. Some T2DM treatments, present in a low number of patients, may be included only in 'Other regimens' because of this.

<sup>b</sup> Only for patients with a 1<sup>st</sup> and 2<sup>nd</sup> line of T2DM treatment (insulins and other blood glucoses lowering drugs).

<sup>c</sup> Only regimens present in at least 1.5% of patients with a 1<sup>st</sup> and 2<sup>nd</sup> LoT will be reported.



**Supplementary Table 6: Proportion of patients using other treatments and screening tests stratified by with or without CVD history at baseline**

| Type of therapy <sup>a</sup>                                                 | Values, N (%) |
|------------------------------------------------------------------------------|---------------|
| <b>Use of concomitant medications</b>                                        |               |
| <b>Patients without cardiovascular disease history, (N=598) <sup>b</sup></b> |               |
| Statins                                                                      | 397 (66.4%)   |
| Aspirin                                                                      | 296 (49.5%)   |
| ACE-I/ARB                                                                    | 140 (23.4%)   |
| <b>Patients with cardiovascular disease history, (N=35) <sup>b</sup></b>     |               |
| Statins                                                                      | 21 (60.0%)    |
| Aspirin                                                                      | 23 (65.7%)    |
| ACE-I/ARB                                                                    | 12 (34.3%)    |
| <b>Screening tests and patient management proportions</b>                    |               |
| <b>Screened for eye disease</b>                                              |               |
| Yes                                                                          | 391 (61.3%)   |
| No                                                                           | 247 (38.7%)   |
| <b>Screened for renal disease</b>                                            |               |
| Yes                                                                          | 14 (2.2%)     |
| No                                                                           | 624 (97.8%)   |
| <b>Received intensive insulin after MI</b>                                   |               |
| Yes                                                                          | 0 (0.0%)      |
| No                                                                           | 2 (100.0%)    |

*ACE-I* angiotensin converting enzyme inhibitor, *ARB* angiotensin receptor blocker, *CVD* cardiovascular disease, *MI* myocardial infarction.

<sup>a</sup> Multi-response variable.

<sup>b</sup> Patients with missing information excluded. Only treatments with valid start date included.

**Supplementary Table 7: Description of number and cost of screening tests during follow-up per-patient per year**

| <b>Parameters</b>                       | <b>Description</b>             | <b>Overall (N=638)</b> |
|-----------------------------------------|--------------------------------|------------------------|
| Presence of eye screening               | Yes                            | 391 (61.3%)            |
|                                         | No                             | 247 (38.7%)            |
| Frequency of eye screening <sup>a</sup> | N                              | 388                    |
|                                         | Mean (SD), (number/year)       | 0.51 (0.29)            |
|                                         | Median [Q1, Q3], (number/year) | 0.493 [0.32, 0.602]    |
|                                         | (Range)                        | (0.095, 1.68)          |
|                                         | Missing (n)                    | 3                      |
| Cost for eye screening <sup>a,b</sup>   | N                              | 388                    |
|                                         | Mean (SD), (SAR/year)          | 129.4 (73.6)           |
|                                         | Median [Q1, Q3], (SAR/year)    | 125.2 [81.3, 153.0]    |
|                                         | (Range)                        | (24.1, 426.2)          |
|                                         | Missing (n)                    | 3                      |
| Presence of foot care                   | Yes                            | 380 (59.6%)            |
|                                         | No                             | 258 (40.4%)            |
| Frequency of foot care <sup>a</sup>     | N                              | 379                    |
|                                         | Mean (SD), (number/year)       | 0.686 (0.476)          |
|                                         | Median [Q1, Q3], (number/year) | 0.534 [0.235, 1.18]    |
|                                         | (Range)                        | (0.0941, 1.99)         |
|                                         | Missing (n)                    | 1                      |
| Cost for foot care <sup>a,c</sup>       | N                              | 379                    |
|                                         | Mean (SD), (SAR/year)          | 514.5 (356.7)          |
|                                         | Median [Q1, Q3], (SAR/year)    | 400.2 [176.2, 887.0]   |
|                                         | (Range)                        | (70.6, 1494.7)         |
|                                         | Missing (n)                    | 1                      |
| Presence of MA testing                  | Yes                            | 13 (2.0%)              |
|                                         | No                             | 625 (98.0%)            |
| Frequency of MA test <sup>a</sup>       | N                              | 13                     |
|                                         | Mean (SD), (number/year)       | 0.137 (0.0226)         |
|                                         | Median [Q1, Q3], (number/year) | 0.128 [0.118, 0.154]   |
|                                         | (Range)                        | (0.103, 0.168)         |
|                                         | Missing (n)                    | 0                      |

|                                             |                                   |                      |
|---------------------------------------------|-----------------------------------|----------------------|
| Cost for MA test <sup>a,d</sup>             | N                                 | 13                   |
|                                             | Mean (SD),<br>(SAR/year)          | 21.9 (3.62)          |
|                                             | Median [Q1, Q3],<br>(SAR/year)    | 20.5 [19.0, 24.7]    |
|                                             | (Range)                           | (16.4, 26.9)         |
|                                             | Missing (n)                       | 0                    |
| Presence of GRP                             | Yes                               | 5 (0.8%)             |
|                                             | No                                | 633 (99.2%)          |
| Frequency of GRP test <sup>a</sup>          | N                                 | 5                    |
|                                             | Mean (SD),<br>(number/year)       | 0.147 (0.0242)       |
|                                             | Median [Q1, Q3],<br>(number/year) | 0.154 [0.128, 0.168] |
|                                             | (Range)                           | (0.115, 0.168)       |
|                                             | Missing (n)                       | 0                    |
| Cost for GRP test <sup>a,e</sup>            | N                                 | 5                    |
|                                             | Mean (SD),<br>(SAR/year)          | 5.87 (0.968)         |
|                                             | Median [Q1, Q3],<br>(SAR/year)    | 6.16 [5.13, 6.73]    |
|                                             | (Range)                           | (4.6, 6.73)          |
|                                             | Missing (n)                       | 0                    |
| Presence of electrocardiogram               | Yes                               | 91 (14.3%)           |
|                                             | No                                | 547 (85.7%)          |
| Frequency of electrocardiogram <sup>a</sup> | N                                 | 91                   |
|                                             | Mean (SD),<br>(number/year)       | 0.153 (0.0792)       |
|                                             | Median [Q1, Q3],<br>(number/year) | 0.12 [0.118, 0.142]  |
|                                             | (Range)                           | (0.0922, 0.501)      |
|                                             | Missing (n)                       | 0                    |
| Cost for electrocardiogram <sup>a,f</sup>   | N                                 | 91                   |
|                                             | Mean (SD),<br>(SAR/year)          | 22.9 (11.9)          |
|                                             | Median [Q1, Q3],<br>(SAR/year)    | 18.0 [17.8, 21.3]    |
|                                             | (Range)                           | (13.8, 75.1)         |
|                                             | Missing (n)                       | 0                    |
| Presence of other screening                 | Yes                               | 3 (0.5%)             |
|                                             | No                                | 635 (99.5%)          |
| Frequency of other screening <sup>a</sup>   | N                                 | 2                    |
|                                             | Mean (SD),<br>(number/year)       | 0.146 (0.0066)       |

|  |                                   |                      |
|--|-----------------------------------|----------------------|
|  | Median [Q1, Q3],<br>(number/year) | 0.146 [0.143, 0.148] |
|  | (Range)                           | (0.141, 0.15)        |
|  | Missing (n)                       | 1                    |

*GRP* gross renal proteinuria, *MA* microalbuminuria, *N* Total number of patients with available data, *Q1* quartile 1, *Q3* quartile 3, *SAR* Saudi Arabian Riyal, *SD* standard deviation.

<sup>a</sup> Patients not having this type of screening, are not included.

<sup>b</sup> Cost of eye screening estimated as 254 SAR.

<sup>c</sup> Cost of foot care estimated as 750 SAR.

<sup>d</sup> Cost of MA test estimated as 160 SAR.

<sup>e</sup> Cost of GRP test estimated as 40 SAR.

<sup>f</sup> Cost of electrocardiogram estimated as 150 SAR.

**Supplementary Table 8: Annual treatment cost (SAR) inputs of the most common 1<sup>st</sup> LoT for T2DM**

| <b>Regimen, ATC codes</b>        | <b>Drugs</b>                                             | <b>Annual drug cost</b> | <b>SMBG cost <sup>a</sup></b> | <b>Total annual costs</b> |
|----------------------------------|----------------------------------------------------------|-------------------------|-------------------------------|---------------------------|
| Regimen 1: A10BA + A10BB         | Biguanides + sulphonylureas                              | 468.83                  | -                             | 468.83                    |
| Regimen 2: A10BA                 | Biguanides                                               | 350.24                  | -                             | 350.24                    |
| Regimen 3: A10BA + A10BB + A10BH | Biguanides + sulphonylureas + DPP-4 inhibitors           | 4,486.58                | -                             | 4,486.58                  |
| Regimen 4: A10AB + A10AE         | Fast-acting insulins + long-acting insulins              | 2,408.59                | 1,976.73                      | 4,385.32                  |
| Regimen 5: A10BA + A10BH         | Biguanides + DPP-4 inhibitors                            | 4,367.99                | -                             | 4,367.99                  |
| Regimen 6: A10AD + A10BA         | Premixed insulins + biguanides                           | 1,606.70                | 1,976.73                      | 3,583.44                  |
| Regimen 7: A10AB + A10AE + A10BA | Fast-acting insulins + long-acting insulins + biguanides | 2,758.83                | 1,976.73                      | 4,735.56                  |
| Regimen 8: A10AE                 | Long-acting insulins                                     | 1,267.86                | 658.91                        | 1,926.77                  |

ATC anatomical therapeutic chemical, DPP-4 dipeptidyl peptidase 4, LoT line of therapy, SAR Saudi Arabian Riyal, SMBG self-monitoring blood glucose, T2DM type 2 diabetes mellitus.

<sup>a</sup> Including cost of blood glucose test strip and lancets.

**Supplementary Table 9: Predicted event rates of T2DM-related complications per 1000 patient-years calculated with CDM**

| Event rate per 1000 patient-years  | Regimens |       |        |         |        |          |          |          |
|------------------------------------|----------|-------|--------|---------|--------|----------|----------|----------|
|                                    | 1        | 2     | 3      | 4       | 5      | 6        | 7        | 8        |
| <b>Renal disease</b>               |          |       |        |         |        |          |          |          |
| MA                                 | 12.48    | 8.69  | 9.97   | 16.49   | 12.24  | 22.73    | 17.73    | 16.72    |
| GRP                                | 2.67     | 1.33  | 1.68   | 4.74    | 2.71   | 9.80     | 5.76     | 4.69     |
| ESRD                               | 0.43     | 0.16  | 0.23   | 1.02    | 0.46   | 3.19     | 1.39     | 0.99     |
| <b>Cardiovascular disease</b>      |          |       |        |         |        |          |          |          |
| PVD                                | 6.13     | 4.99  | 5.22   | 7.38    | 5.77   | 9.80     | 7.14     | 6.97     |
| HF                                 | 6.36     | 6.69  | 6.10   | 7.35    | 6.86   | 10.17    | 8.25     | 7.19     |
| Angina                             | 8.45     | 7.03  | 7.63   | 8.98    | 6.54   | 9.85     | 9.32     | 9.90     |
| Stroke                             | 4.17     | 3.73  | 3.75   | 4.56    | 4.02   | 5.07     | 4.25     | 4.65     |
| <b>Ocular disease</b>              |          |       |        |         |        |          |          |          |
| BDR                                | 13.74    | 9.76  | 11.09  | 17.45   | 13.54  | 23.64    | 18.68    | 18.12    |
| PDR                                | 2.69     | 1.36  | 1.73   | 4.33    | 2.72   | 8.13     | 4.95     | 4.55     |
| ME                                 | 11.36    | 7.91  | 8.99   | 14.66   | 11.17  | 20.46    | 15.72    | 15.18    |
| SVL                                | 6.27     | 4.10  | 4.86   | 8.58    | 6.21   | 12.71    | 9.33     | 9.30     |
| Cataract                           | 5.83     | 4.92  | 5.29   | 6.62    | 5.74   | 8.37     | 7.05     | 6.56     |
| <b>Ulcer/amputation/neuropathy</b> |          |       |        |         |        |          |          |          |
| Ulcer                              | 1.45     | 1.49  | 1.38   | 1.70    | 1.51   | 2.49     | 2.04     | 1.77     |
| Recurrent ulcer                    | 1.35     | 1.38  | 1.29   | 1.56    | 1.39   | 2.20     | 1.83     | 1.61     |
| 1 <sup>st</sup> Amputation         | 0.38     | 0.38  | 0.36   | 0.47    | 0.39   | 0.71     | 0.54     | 0.48     |
| 2 <sup>nd</sup> Amputation         | 0.14     | 0.12  | 0.13   | 0.17    | 0.14   | 0.25     | 0.20     | 0.17     |
| Neuropathy                         | 28.04    | 24.09 | 25.36  | 30.80   | 27.85  | 35.68    | 31.85    | 30.67    |
| <b>Hypoglycaemia</b>               |          |       |        |         |        |          |          |          |
| NSHE                               | 34.58    | 0.00  | 183.96 | 3152.18 | 149.35 | 1,323.90 | 2,988.84 | 3,434.65 |
| SHE1                               | 34.50    | 0.00  | 34.61  | 21.65   | 11.53  | 5.39     | 15.94    | 10.41    |
| SHE2                               | 1.76     | 0.00  | 3.15   | 2.22    | 1.50   | 0.36     | 1.52     | 0.95     |

CDM Core Diabetes Model, *BDR* background diabetic retinopathy, *ESRD* end-stage renal disease, *GRP* gross renal proteinuria, *HF* heart failure, *MA* microalbuminuria, *ME* macular oedema, *NSHE* non-severe hypoglycaemia, *PDR* proliferative diabetic retinopathy, *PVD* peripheral vascular disease, *SHE1* severe hypoglycaemia (requiring non-medical assistance), *SHE2* severe hypoglycaemia (requiring medical assistance), *SVL* severe visual loss, *T2DM* type 2 diabetes mellitus.

Regimen 1: A10BA + A10BB = Biguanides + Sulphonylureas.

Regimen 2: A10BA = Biguanides.

Regimen 3: A10BA + A10BB + A10BH = Biguanides + Sulphonylureas + DPP-4 inhibitors.

Regimen 4: A10AB + A10AE = Fast-acting insulins + Long-acting insulins.

Regimen 5: A10BA + A10BH = Biguanides + DPP-4 inhibitors.

Regimen 6: A10AD + A10BA = Premixed insulins + Biguanides.

Regimen 7: A10AB + A10AE + A10BA = Fast-acting insulins + Long-acting insulins + Biguanides.

Regimen 8: A10AE = Long-acting insulins.

## References

1. Almalki Z, Alatawi Y, Alharbi A, et al. Cost-Effectiveness of More Intensive Blood Pressure Treatment in Patients with High Risk of Cardiovascular Disease in Saudi Arabia: A Modelling Study of Meta-Analysis. *Int J Hypertens*. 2019;2019:6019401.
2. Osman AM, Alsultan MS, Al-Mutairi MA. The burden of ischemic heart disease at a major cardiac center in Central Saudi Arabia. *Saudi Med J*. 2011;32(12):1279-84.
3. Hnoosh A, Vega-Hernández G, Jugrin A, Todorova L. PDB45 Direct medical costs of diabetes-related complications in Saudi Arabia. *Value in Health*. 2012;15(4):A178.
4. Al-Jedai A, Alsultan M, Almeshari K, et al. Cost analysis of kidney transplantation in highly sensitized recipients compared to intermittent maintenance hemodialysis. *Ann Transplant*. 2012;17(4):82-91.
5. Alotaibi A, Aldoukhi A, Albdah B, Alonazi JA, Alseraya AS, Alrasheed N. Diabetic Ketoacidosis Treatment Outcome and Associated Factors Among Adult Patients Admitted to the Emergency Department and Medical Wards at King Abdulaziz Medical City, Riyadh, Saudi Arabia. *Cureus*. 2020;12(8):e10067.
6. Alshammary S, Othman SA, Alshammari E, et al. Economic impact of diabetic foot ulcers on healthcare in Saudi Arabia: a retrospective study. *Ann Saudi Med*. 2020;40(5):425-35.
7. Aljefri S, Al Adel F. The validity of diabetic retinopathy screening using nonmydriatic fundus camera and optical coherence tomography in comparison to clinical examination. *Saudi Journal of Ophthalmology*. 2020;34(4):266.
8. Hasanato RM. Diagnostic efficacy of random albumin creatinine ratio for detection of micro and macro-albuminuria in type 2 diabetes mellitus. *Saudi medical journal*. 2016;37(3):268.
9. Beaudet A, Clegg J, Thuresson PO, Lloyd A, McEwan P. Review of utility values for economic modeling in type 2 diabetes. *Value Health*. 2014;17(4):462-70.
10. Lauridsen JT, Lønborg J, Gundgaard J, Jensen HH. Diminishing marginal disutility of hypoglycaemic events: results from a time trade-off survey in five countries. *Qual Life Res*. 2014;23(9):2645-50.
11. Foos V, McEwan P. Conversion of Hypoglycemia Utility Decrements from Categorical Units Reflecting Event History into Event Specific Disutility Scores Applicable to Diabetes Decision Models. *Value in Health*. 2018;21:S223.
12. Bagust A, Beale S. Modelling EuroQol health-related utility values for diabetic complications from CODE-2 data. *Health Econ*. 2005;14(3):217-30.
